# Supplementary material
Source: publisher site journal article supplement (https://www.dovepress.com/article/101584)
Supplement: Supplementary file 1 [file get_supplementary_file.php]

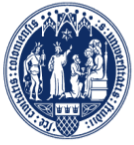

## **Patient Preferences in the treatment of age-related macular degeneration**

Dear Patient,

We kindly invite you to participate in our study on the elicitation of patient preferences for different treatments of age related macular degeneration (AMD). The study is coordinated by the University Hospital Cologne. The results of the study will contribute to develop therapies based on patients needs and to improve patient involvement in treatment decisions. You have been invited to participate in this study because you as an affected patient know best about treatment aspects, which are important to patients. For the study we ask you to complete a questionnaire, which consists of 13 questions. Completing the questionnaire takes between 30 and 40 minutes. We are happy to help you with the questionnaire.

In the questionnaire you will be presented with two different treatment options in each question. Of those options, we ask you to indicate the treatment option you prefer. There are no

incorrect answers for this questionnaire as we are solely interested in your personal opinion on the treatments. Your answers in this questionnaire do not influence your actual treatment.

Participation in this questionnaire is completely voluntary. All questionnaires will be analyzed anonymously and cannot be combined with your name.

The study is supported financially by Bayer HealthCare. The ethics review board of the University Hospital consented to this study.

Each question should be answered, because incomplete questionnaires complicate data analysis.

Thank you very much for participating in this study.

## **Part 1 Personal data**

At first, we would like you to provide some personal information, which helps us during the analysis of the questionnaires.

### **1. At the present time, how would you describe your eyesight using both eyes (with glasses or contact lenses**

|           |  |
|-----------|--|
| excellent |  |
| good      |  |
| fair      |  |
| poor      |  |
| very poor |  |

### **2. In general, would you describe your overall health**

|           |  |
|-----------|--|
| excellent |  |
| good      |  |
| fair      |  |
| poor      |  |
| very poor |  |

### 3. What is your gender?

|        |  |
|--------|--|
| female |  |
| male   |  |

### 4. Please indicate your age group:

|                       |  |
|-----------------------|--|
| younger than 45 years |  |
| 45- 54 years          |  |
| 55- 64 years          |  |
| 65- 74 years          |  |
| 75 years or older     |  |

### 5. How long have you been diagnosed with AMD?

|                  |  |
|------------------|--|
| Less than 1 year |  |
| 1-5 years        |  |
| 6 years or more  |  |

**6. Are one or both eyes affected by AMD**

|           |  |
|-----------|--|
| One eye   |  |
| Both eyes |  |

**7. How many injections did you receive already**

|                         |  |
|-------------------------|--|
| 1-5 Injections          |  |
| 6-12 Injections         |  |
| more than 12 Injections |  |

**8. Please tick your highest educational level**

|                               |  |
|-------------------------------|--|
| No degree                     |  |
| Lower secondary education     |  |
| College                       |  |
| Academic or comparable degree |  |

## **Part 2 Introduction**

Please imagine that your eye disease is currently active and you already received three initial injections for treating the AMD. Now you have to decide about the treatment you prefer to receive for the next year. Your doctor offers different drugs between which you have to choose.

The drugs differ with regard to various treatment attributes: effect on visual function, injection frequency, monitoring frequency, approval status of the drug and side effects. These treatment characteristics will now be explained in more detail.

## **Treatment Characteristics**

### **Monitoring frequency**

During the treatment of your disease, monitoring examinations are performed in order to see whether there is still or again fluid in your eye. At these monitoring visits a vision test is performed and a photograph of your eyes by means of an Optical Coherence Tomography (OCT) is taken.

The monitoring visits can take place

- **monthly,**
- **every two months,**
- **every four months.**

## **Injection frequency:**

The Injection frequency indicates how often injections will be performed. The injections can be performed in the following frequencies

- **scheduled, monthly:** Every month you receive an injection in the eye.
- **scheduled, every two months:** Every two months you receive an injection in the eye.
- **scheduled, every four months:** Every four months you receive an injection in the eye.
- **on demand, following monthly monitoring:** You have to attend monthly monitoring visits. In case fluid in your eye is diagnosed or your visual function decreased, you receive another injection at a subsequent appointment.

### **Effect on visual function:**

The effect on visual functioning indicates the influence of the treatment on your visual functioning.

- **Stabilization:** Your current visual functioning will be stabilized, which means that your visual functioning for the moment will neither decrease nor improve.
- **Improvement:** The treatment leads to an improvement of your visual functioning. An improvement might be different for different patients. You might for example be able to read without magnifying glasses, recognize faces or be able to drive a car.

### **Approval status:**

In Germany new drugs have to be tested in clinical trials. If a new drug is safe and effective for treating a specific disease, it can be approved by the approval authority. This approval means that the drug can be used for treating the disease for which it has been tested and received the approval. Sometimes it may happen that a drug seems to be effective for treating another disease as well. Even though the drug is not approved for the second disease, it might be used for treating AMD and the insurance companies might reimburse the drug.

- **Approved for AMD:** The drug has been assessed by the approval authority and was approved for the treatment of AMD.
- **Not approved for AMD:** The drug was has not been assessed by the approval authority and therefore is not approved for the treatment of AMD.

*The flow chart was used to support written & verbal explanation of the approval process.*

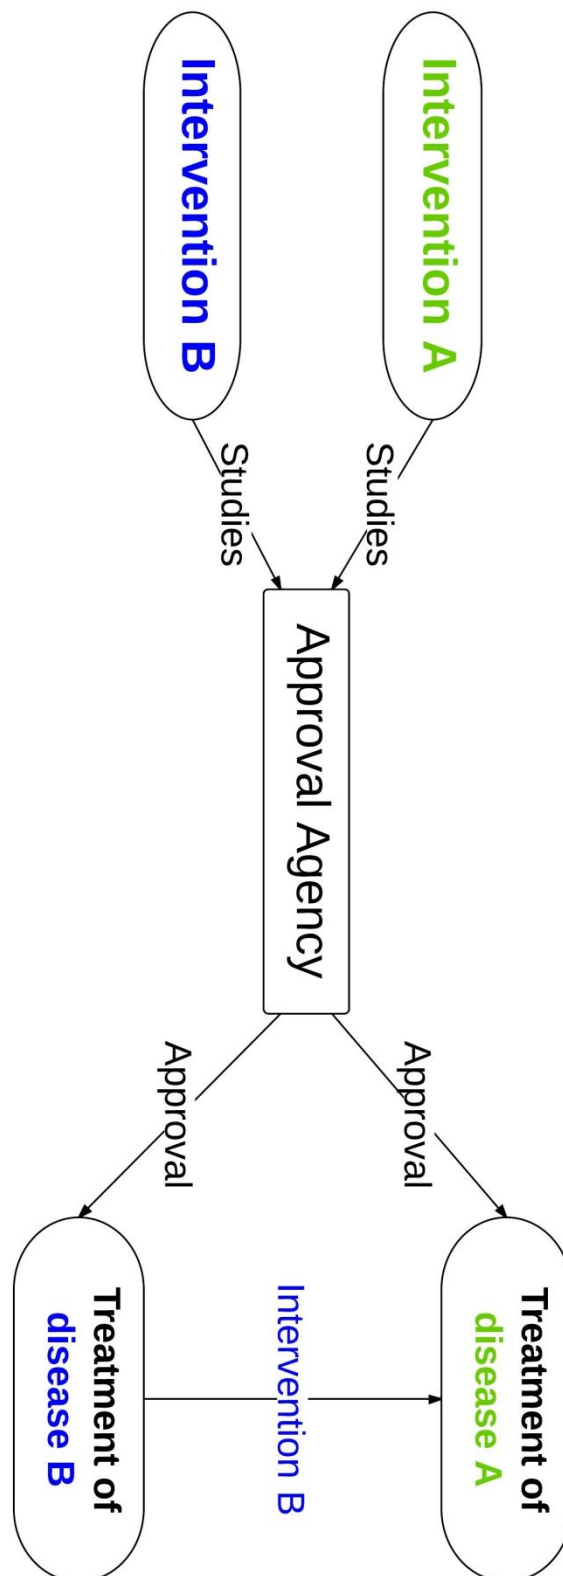

## **Side effects:**

Different drugs have different side effects. The information on the side effects refers to 1000 patients who are treated with injections for one year.

- **Mild-moderate side effects in the eye, which occur frequently:** These side effects occur often, which means that around half of the patients who are treated for one year will be affected. These side effects do not need to be treated. Examples of these side effects are sensitivity to light or foreign body sensation in the eye.
- **Severe side effects in the eye, which occur rarely:** These side effects occur seldom, which means that 1-2 of 1000 patients who are treated for one year will be affected. These side effects need to be treated immediately. Examples of these side effects are inflammation in the eye or injuries of the retina.
- **Very severe systemic side effects, which occur very rarely:** These side effects occur very rarely, which means that less than 1 of 1000 patients who are treated for one year will be affected. These side effects need to be

treated immediately. Examples of these side effects include stroke or heart attack.

## Choice of treatments

In each of the following 13 questions you will be presented with two treatment options. Please indicate the treatment you prefer. The following example will illustrate the task.

You are in a restaurant and have to choose between two dishes. Take a look at all the components of the dish and choose the preferred dish.

|                     | <b>Dish A</b> | <b>Dish B</b> |
|---------------------|---------------|---------------|
| <b>Garnish</b>      | Potatoe       | Rice          |
| <b>Meat</b>         | Beef          | Fish          |
| <b>Salad</b>        | Tomatoe salad | Mixed Salat   |
| Tick preferred dish |               |               |

In the following 13 questions you won't have to choose between dishes, but treatments. Carefully read the complete description of treatments and tick the treatment you prefer.

| <b>Question 1</b>                                | <b>Treatment A</b>                   | <b>Treatment B</b>                      |
|--------------------------------------------------|--------------------------------------|-----------------------------------------|
| <b>Monitoring frequency</b>                      | every four months                    | monthly                                 |
| <b>Effect on visual function</b>                 | improvement                          | stabilization                           |
| <b>Injection frequency</b>                       | scheduled, every two months          | on demand, following monthly monitoring |
| <b>Approval status</b>                           | not approved                         | approved                                |
| <b>Side effects</b>                              | mild–moderate, frequent, eye related | severe, rare, eye related               |
| (Asked verbally: Which treatment do you prefer?) |                                      |                                         |

| <b>Question 2</b>                                | <b>Treatment A</b>        | <b>Treatment B</b>                   |
|--------------------------------------------------|---------------------------|--------------------------------------|
| <b>Monitoring frequency</b>                      | monthly                   | every two months                     |
| <b>Effect on visual function</b>                 | improvement               | stabilization                        |
| <b>Injection frequency</b>                       | scheduled, every month    | scheduled, every two months          |
| <b>Approval status</b>                           | not approved              | approved                             |
| <b>Side effects</b>                              | severe, rare, eye related | mild–moderate, frequent, eye related |
| (Asked verbally: Which treatment do you prefer?) |                           |                                      |

| <b>Question 3</b>                                | <b>Treatment A</b>           | <b>Treatment B</b>                   |
|--------------------------------------------------|------------------------------|--------------------------------------|
| <b>Monitoring frequency</b>                      | every four months            | monthly                              |
| <b>Effect on visual function</b>                 | improvement                  | improvement                          |
| <b>Injection frequency</b>                       | scheduled, every four months | scheduled, every month               |
| <b>Approval status</b>                           | not approved                 | approved                             |
| <b>Side effects</b>                              | severe, rare, eye related    | mild–moderate, frequent, eye related |
| (Asked verbally: Which treatment do you prefer?) |                              |                                      |

| <b>Question 4</b>                                | <b>Treatment A</b>          | <b>Treatment B</b>                   |
|--------------------------------------------------|-----------------------------|--------------------------------------|
| <b>Monitoring frequency</b>                      | every four months           | every two months                     |
| <b>Effect on visual function</b>                 | stabilization               | improvement                          |
| <b>Injection frequency</b>                       | scheduled, every two months | scheduled, every month               |
| <b>Approval status</b>                           | approved                    | not approved                         |
| <b>Side effects</b>                              | severe, rare, eye related   | mild–moderate, frequent, eye related |
| (Asked verbally: Which treatment do you prefer?) |                             |                                      |

| <b>Question 5</b>                                | <b>Treatment A</b>                      | <b>Treatment B</b>               |
|--------------------------------------------------|-----------------------------------------|----------------------------------|
| <b>Monitoring frequency</b>                      | monthly                                 | monthly                          |
| <b>Effect on visual function</b>                 | stabilization                           | stabilization                    |
| <b>Injection frequency</b>                       | on demand, following monthly monitoring | scheduled, every four months     |
| <b>Approval status</b>                           | not approved                            | not approved                     |
| <b>Side effects</b>                              | mild–moderate, frequent, eye related    | very severe, very rare, systemic |
| (Asked verbally: Which treatment do you prefer?) |                                         |                                  |

| <b>Question 6</b>                                | <b>Treatment A</b>                   | <b>Treatment B</b>               |
|--------------------------------------------------|--------------------------------------|----------------------------------|
| <b>Monitoring frequency</b>                      | monthly                              | every four months                |
| <b>Effect on visual function</b>                 | stabilization                        | improvement                      |
| <b>Injection frequency</b>                       | scheduled, every four months         | scheduled, every two months      |
| <b>Approval status</b>                           | approved                             | not approved                     |
| <b>Side effects</b>                              | mild–moderate, frequent, eye related | very severe, very rare, systemic |
| (Asked verbally: Which treatment do you prefer?) |                                      |                                  |

| <b>Question 7</b>                                | <b>Treatment A</b>               | <b>Treatment B</b>        |
|--------------------------------------------------|----------------------------------|---------------------------|
| <b>Monitoring frequency</b>                      | every two months                 | every four months         |
| <b>Effect on visual function</b>                 | improvement                      | stabilization             |
| <b>Injection frequency</b>                       | scheduled, every four months     | scheduled, every month    |
| <b>Approval status</b>                           | not approved                     | approved                  |
| <b>Side effects</b>                              | very severe, very rare, systemic | severe, rare, eye related |
| (Asked verbally: Which treatment do you prefer?) |                                  |                           |

| <b>Question 8</b>                                | <b>Treatment A</b>        | <b>Treatment B</b>                      |
|--------------------------------------------------|---------------------------|-----------------------------------------|
| <b>Monitoring frequency</b>                      | every two months          | monthly                                 |
| <b>Effect on visual function</b>                 | improvement               | stabilization                           |
| <b>Injection frequency</b>                       | scheduled, every month    | on demand, following monthly monitoring |
| <b>Approval status</b>                           | approved                  | not approved                            |
| <b>Side effects</b>                              | severe, rare, eye related | very severe, very rare, systemic        |
| (Asked verbally: Which treatment do you prefer?) |                           |                                         |

| <b>Question 9</b>                                | <b>Treatment A</b>               | <b>Treatment B</b>          |
|--------------------------------------------------|----------------------------------|-----------------------------|
| <b>Monitoring frequency</b>                      | every four months                | monthly                     |
| <b>Effect on visual function</b>                 | stabilization                    | improvement                 |
| <b>Injection frequency</b>                       | scheduled, every month           | scheduled, every two months |
| <b>Approval status</b>                           | approved                         | not approved                |
| <b>Side effects</b>                              | very severe, very rare, systemic | severe, rare, eye related   |
| (Asked verbally: Which treatment do you prefer?) |                                  |                             |

| <b>Question 10</b>                                  | <b>Treatment A</b>                  | <b>Treatment B</b>                      |
|-----------------------------------------------------|-------------------------------------|-----------------------------------------|
| <b>Monitoring frequency</b>                         | every two months                    | every four months                       |
| <b>Effect on visual function</b>                    | stabilization                       | improvement                             |
| <b>Injection frequency</b>                          | every two months                    | scheduled, every four months            |
| <b>Approval status</b>                              | approved                            | approved                                |
| <b>Side effects</b>                                 | very severe, very rare,<br>systemic | mild–moderate, frequent, eye<br>related |
| (Asked verbally: Which<br>treatment do you prefer?) |                                     |                                         |

| Question 11                                         | Treatment A                                | Treatment B                 |
|-----------------------------------------------------|--------------------------------------------|-----------------------------|
| <b>Monitoring frequency</b>                         | monthly                                    | every two months            |
| <b>Effect on visual function</b>                    | improvement                                | stabilization               |
| <b>Injection frequency</b>                          | on demand, following<br>monthly monitoring | scheduled, every two months |
| <b>Approval status</b>                              | approved                                   | not approved                |
| <b>Side effects</b>                                 | very severe, very rare,<br>systemic        | severe, rare, eye related   |
| (Asked verbally: Which<br>treatment do you prefer?) |                                            |                             |

| <b>Question 12</b>                               | <b>Treatment A</b>                   | <b>Treatment B</b>               |
|--------------------------------------------------|--------------------------------------|----------------------------------|
| <b>Monitoring frequency</b>                      | monthly                              | every two months                 |
| <b>Effect on visual function</b>                 | stabilization                        | improvement                      |
| <b>Injection frequency</b>                       | scheduled, every two months          | scheduled, every four months     |
| <b>Approval status</b>                           | not approved                         | approved                         |
| <b>Side effects</b>                              | mild–moderate, frequent, eye related | very severe, very rare, systemic |
| (Asked verbally: Which treatment do you prefer?) |                                      |                                  |

| <b>Question 13</b>                               | <b>Treatment A</b>           | <b>Treatment B</b>                   |
|--------------------------------------------------|------------------------------|--------------------------------------|
| <b>Monitoring frequency</b>                      | every four months            | monthly                              |
| <b>Effect on visual function</b>                 | improvement                  | improvement                          |
| <b>Injection frequency</b>                       | scheduled, every four months | scheduled, every month               |
| <b>Approval status</b>                           | not approved                 | approved                             |
| <b>Side effects</b>                              | severe, rare, eye related    | mild–moderate, frequent, eye related |
| (Asked verbally: Which treatment do you prefer?) |                              |                                      |

**How do you rate the difficulty of this questionnaire?**

| difficult | rather difficult | neutral | rather easy | easy |
|-----------|------------------|---------|-------------|------|
|           |                  |         |             |      |
